# Supplementary material for: A Drug Screening Reveals Minocycline Hydrochloride as a Therapeutic Option to Prevent Breast Cancer Cells Extravasation across the Blood–Brain Barrier
Source: MDPI journal article supplement (doi:10.3390/biomedicines10081988), 2022-08-16
Supplement: s1 [file s1]

# Supplementary Data:

Supplementary Table S1. Summary of the molecules used and their molecular and structural features

| Drug type        | Drug       | Abbreviation used | Zinc ID / CAS number | Molecular weight (g/mol) | Chemical Structure                                                                    |
|------------------|------------|-------------------|----------------------|--------------------------|---------------------------------------------------------------------------------------|
| PI3K inhibitor   | Molecule 1 | Mol1              | ZINC20615563         | 518.4                    | 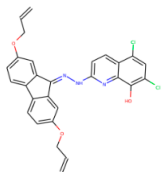   |
|                  | Molecule 2 | Mol2              | ZINC36307506         | 475.6                    |    |
|                  | Molecule 3 | Mol3              | ZINC9873787          | 477.6                    |   |
|                  | Molecule 4 | Mol4              | ZINC977288           | 365.4                    |  |
|                  | Molecule 5 | Mol5              | ZINC1488208          | 369.2                    |  |
|                  | Molecule 6 | Mol6              | ZINC218287337        | 423.9                    |  |
|                  | Buparlisib | BKM120            | ZINC43154039         | 410.39                   |  |
| HSP 90 inhibitor | KW-2478    | KW-2478           | ZINC68202727         | 574.7                    |  |

|                                                  |                           |          |              |        |                                                                                       |
|--------------------------------------------------|---------------------------|----------|--------------|--------|---------------------------------------------------------------------------------------|
| EGFR<br>Tyrosine Kinase                          | Canertinib                | CI-1033  | ZINC27439698 | 485.9  | 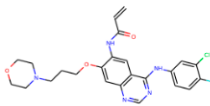   |
| Sphingosine-1-phosphate<br>receptor<br>modulator | Fingolimod                | FTY720   | 162359-56-0  | 343.93 |    |
|                                                  | Fingolimod-phosphate      | FTY720-P | 402615-91-2  | 387.45 |    |
| Tetracycline                                     | Minocycline hydrochloride | MH       | 13614-98-7   | 493.9  |  |
|                                                  | Minocycline Base          | MB       | 10118-90-8   | 457.48 |  |
|                                                  | Doxycycline Hyclate       | DH       | 24390-14-5   | 1025.9 |  |
|                                                  | Doxycycline Monohydrate   | DM       | 17086-28-1   | 462.4  |  |
